# Supplementary material
Source: Elsevier journal article supplement (https://www.sciencedirect.com/science/article/pii/S0034935621001031)
Supplement: mmc1 [file S0034935621001031:mmc1.docx]

**Tabla Suplementaria 1. Características perioperatorias de acuerdo a grupos predefinidos de presión de pulso preoperatoria**

|  | **<40 mmHg** | | **40-80 mmHg** | | **>80 mmHg** | **p,overall** |
| --- | --- | --- | --- | --- | --- | --- |
|  | *N=107* | | *N=626* | | *N=71* |  |
| Mujer | 29 (27,36%) | | 243 (39,13%) | | 34 (47,89%) | 0,016 |
| Hombre | 77 (72,64%) | | 378 (60,87%) | | 37 (52,11%) |  |
| Edad, años, Mediana (IQR) | 58,50 [49,00;69,75] | | 73,00 [63,00;80,00] | | 79,00 [73,50;83,00] | <0,001 |
| ASA |  | |  | |  | , |
| 1 | 13 (12,26%) | | 59 (9,52%) | | 1 (1,41%) |  |
| 2 | 58 (54,72%) | | 344 (55,48%) | | 32 (45,07%) |  |
| 3 | 34 (32,08%) | | 208 (33,55%) | | 36 (50,70%) |  |
| 4 | 1 (0,94%) | | 9 (1,45%) | | 2 (2,82%) |  |
| Grupos ASA |  | |  | |  | 0,007 |
| 1-2 | 71 (66,98%) | | 403 (65,00%) | | 33 (46,48%) |  |
| 3-4 | 35 (33,02%) | | 217 (35,00%) | | 38 (53,52%) |  |
| Presión arterial sistólica preoperatoria, mmHg, Mediana (IQR) | 109,00 [101,00;116,00] | | 131,00 [120,00;142,00] | | 158,00 [150,00;172,00] | <0,001 |
| Presión arterial diastólica preoperatoria, mmHg, Mediana (IQR) | 74,00 [67,00;84,00] | | 73,00 [65,00;81,00] | | 70,00 [59,00;77,00] | 0,005 |
| Presión arterial media preoperatoria, mmHg, Mediana (IQR) | 88,00 [80,50;98,00] | | 96,10 [88,65;104,75] | | 104,20 [96,60;114,20] | <0,001 |
| Velocidad onda de pulso estimada, m/s, Mediana (IQR) | 9,90 [8,59;12,32] | | 13,23 [11,39;14,83] | | 15,13 [14,07;16,56] | <0,001 |
| <=12 m/s | 78 (73,58%) | | 194 (31,24%) | | 6 (8,57%) |  |
| >12 m/s | 28 (26,42%) | | 427 (68,76%) | | 64 (91,43%) |  |
| Creatinina preoperatoria, mg/d, Mediana (IQR) | 0,88 [0,70;1,00] | | 0,89 [0,70;1,09] | | 0,90 [0,70;1,18] | 0,407 |
| Hemoglobina preoperatoria, g/dl, Mediana ((IQR) | 13,50 [11,70;14,70] | | 12,70 [11,20;14,10] | | 12,00 [10,85;13,17] | 0,001 |
| **Comorbilidades** | |  | |
| Hipertensión arterial | 42 (39,62%) | | 358 (57,65%) | | 56 (78,87%) | <0,001 |
| Diabetes Mellitus | 12 (11,32%) | | 150 (24,15%) | | 27 (38,03%) | <0,001 |
| EPOC | 15 (14,15%) | | 92 (14,81%) | | 10 (14,29%) | 0,980 |
| Insuficiencia renal crónica | 5 (4,72%) | | 56 (9,02%) | | 5 (7,04%) | 0,307 |
| Cardiopatía isquémica | 9 (8,49%) | | 68 (10,95%) | | 10 (14,08%) | 0,502 |
| **Características postoperatorias**: |  | |  | |  |  |
| Complicaciones postopertatorias predefinidas | 64 (60,38%) | | 380 (61,49%) | | 43 (60,56%) | 0,969 |
| Insuficiencia renal aguda | 8 (7,55%) | | 73 (11,77%) | | 10 (14,08%) | 0,791 |
| Mortalidad | 3 (2,83%) | | 37 (5,97%) | | 4 (5,71%) | 0,466 |
| Estancia hospitalaria días, Mediana (IQR) | 9,00 [6,00;16,00] | | 8,00 [6,00;15,00] | | 7,00 [5,00;14,00] | 0,368 |

IRQ: Rango intercuartil, AS: clasificación del estado físico de la Sociedad Americana de Anestesiólogos; EPOC: Enfermedad pulmonar obstructiva crónica

**Tabla Suplementaria 2. Características perioperatorias de acuerdo a grupos de velocidad onda pulso basal preoperatoria predefinidos**

|  | **<=12 m/s** | **>12 m/s** | **p,overall** |
| --- | --- | --- | --- |
|  | *N=278* | *N=519* |  |
| Sexo |  |  |  |
| Mujer | 105 (37,77%) | 200 (38,54%) | 0,892 |
| Hombre | 173 (62,23%) | 319 (61,46%) |  |
| Edad, años, Mediana (IQR) | 56,00 [48,00;62,75] | 78,00 [72,00;82,00] | <0,001 |
| ASA: |  |  | <0,001 |
| 1 | 55 (19,86%) | 18 (3,47%) |  |
| 2 | 166 (59,93%) | 268 (51,64%) |  |
| 3 | 53 (19,13%) | 224 (43,16%) |  |
| 4 | 3 (1,08%) | 9 (1,73%) |  |
| Grupos ASA |  |  | <0,001 |
| 1-2 | 221 (79,78%) | 286 (55,11%) |  |
| 3-4 | 56 (20,22%) | 233 (44,89%) |  |
| Presión arterial sistólica preoperatoria, mmHg, Mediana (IQR) | 120,00 [110,00;130,00] | 138,00 [125,00;149,00] | <0,001 |
| Presión arterial diastólica preoperatoria, mmHg, Mediana (IQR) | 71,50 [64,25;79,00] | 74,00 [65,00;82,00] | 0,019 |
| Presión arterial media preoperatoria, mmHg, Mediana (IQR) | 91,00 [83,05;99,40] | 99,80 [90,80;108,50] | <0,001 |
| Presión de pulso preoperatoria, mmHg, Mediana(IQR) | 46,50 [39,00;54,00] | 62,00 [51,00;73,00] | <0,001 |
| <40 mmHg | 78 (28,06%) | 28 (5,39%) |  |
| 40-80 mmHg | 194 (69,78%) | 427 (82,27%) |  |
| >80 mmHg | 6 (2,16%) | 64 (12,33%) |  |
| Quintiles por Presión de pulso |  |  | <0,001 |
| <40 mmHg | 110 (39,57%) | 52 (10,02%) |  |
| 40-51 mmHg | 77 (27,70%) | 87 (16,76%) |  |
| 51-60 mmHg | 58 (20,86%) | 104 (20,04%) |  |
| 60-70,04 mmHg | 21 (7,55%) | 130 (25,05%) |  |
| >70,04 mmHg | 12 (4,32%) | 146 (28,13%) |  |
| Creatinina preoperatoria, mg/dl, Mediana (IQR) | 0,80 [0,69;1,00] | 0,90 [0,75;1,10] | <0,001 |
| Hemoglobina preoperatoria, g/dl, Mediana ((IQR) | 13,50 [11,80;14,70] | 12,30 [11,00;13,80] | <0,001 |
| Albumina preoperatoria, mg/dl, Mediana (IQR) | 4,00 [3,20;4,40] | 3,80 [3,10;4,20] | 0,022 |
| **Comorbilidades** |  |  |  |
| Hipertensión arterial | 89 (32,01%) | 367 (70,71%) | **<0,001** |
| Diabetes Mellitus | 40 (14,39%) | 149 (28,71%) | **<0,001** |
| EPOC | 23 (8,27%) | 94 (18,15%) | **<0,001** |
| Insuficiencia renal | 10 (3,60%) | 56 (10,79%) | **<0,001** |
| Cardiopatía isquémica | 16 (5,76%) | 71 (13,68%) | **<0,001** |
| **Características postoperatorias** |  |  |  |
| Complicaciones postoperatorias predefinidas | 148 (53,43%) | 338 (65,38%) | 0,001 |
| Insuficiencia renal aguda | 17 (6,12%) | 73 (14,09%) | 0,001 |
| Mortalidad | 7 (2,52%) | 37 (7,14%) | 0,010 |
| Estancia hospitalaria días, Mediana (IQR) | 8,00 [6,00;13,00] | 8,00 [6,00;15,75] | 0,109 |

IRQ: Rango intercuartil, AS: clasificación del estado físico de la Sociedad Americana de Anestesiólogos; EPOC: Enfermedad pulmonar obstructiva crónica
